# Supplementary material for: Transcriptomics-Based Identification of Genes Related to Tapetum Degradation and Microspore Development in Lily
Source: MDPI journal article supplement (doi:10.3390/genes13020366), 2022-02-17
Supplement: s1 [file s1]

**Table S1.** Primers used in this study.

| Genes                     |                | Sequence(5'to 3')      | Fragment size(bp) |
|---------------------------|----------------|------------------------|-------------------|
| MYB80                     | Forward primer | CACTCTGTCGTCGGAAAC     | 154               |
|                           | Reverse primer | TAAGGTGGGAGAAAGGCT     |                   |
| AMS                       | Forward primer | CAAACGGCTGGGACTACT     | 225               |
|                           | Reverse primer | CATGTATCCCGATTGAGG     |                   |
| GSL5                      | Forward primer | GGCATTAGTAAGGCATCC     | 138               |
|                           | Reverse primer | CTGGTTCAGTCCAACATCA    |                   |
| TDF1                      | Forward primer | GTCAGGACCCATCACAAAC    | 194               |
|                           | Reverse primer | CAAGGAAATCACTCCACTC    |                   |
| SERK2-like                | Forward primer | TCTACGCCTTTGGTGTCC     | 143               |
|                           | Reverse primer | AGCAGCCTCCTGTTTTGA     |                   |
| AGAMOUS                   | Forward primer | TCATCTTCCTCCTCCGTT     | 238               |
|                           | Reverse primer | CCTTCTTCAGCAGTCCATT    |                   |
| LLA-115                   | Forward primer | GGGGAATGACGACACCTT     | 150               |
|                           | Reverse primer | CACCACTGAATCCAAACCT    |                   |
| NOZZLE                    | Forward primer | AGACGGAGGTGACGGAGTA    | 117               |
|                           | Reverse primer | CAACAAAATGAGGAGACGGT   |                   |
| GLOX1                     | Forward primer | ATTCAGTCTGGCGGTAC      | 194               |
|                           | Reverse primer | GATTTGGGGATGAACTCGTA   |                   |
| ARF17                     | Forward primer | TTTCCCAAAGGTGCTCAAC    | 118               |
|                           | Reverse primer | CTGGAATGGCAGATAAAGAG   |                   |
| MYB24                     | Forward primer | CAACCACCTTCTCCTTCA     | 135               |
|                           | Reverse primer | CTCCGCTTCTTCTCCACC     |                   |
| FPA                       | Forward primer | AGCCCTTTAGCCATTAC      | 178               |
|                           | Reverse primer | TCTGCTTCAGCCTCTTCC     |                   |
| CYP704B1                  | Forward primer | CAAACGCCACTGTCACGC     | 233               |
|                           | Reverse primer | GTCTTGTTCTCCTCGCCCAC   |                   |
| chalcone synthase (CHS)   | Forward primer | GGGCTAACATTCCACCTA     | 116               |
|                           | Reverse primer | CAGAAAATCGAGTTCCAGTC   |                   |
| chalcone isomerase (CHI)  | Forward primer | TTTTCTGCTGCCACTCC      | 124               |
|                           | Reverse primer | GCTCCCACCCAAATACCA     |                   |
| cysteine proteinase (CYS) | Forward primer | CGTTGAAGGGGAATCATAAG   | 162               |
|                           | Reverse primer | CAGTTGCCTGTTTGTAAGC    |                   |
| 18S                       | Forward primer | AGTTGGTGGAGCGATTTGTCT  |                   |
|                           | Reverse primer | CCTGTTATTGCCTCAAACCTTC |                   |

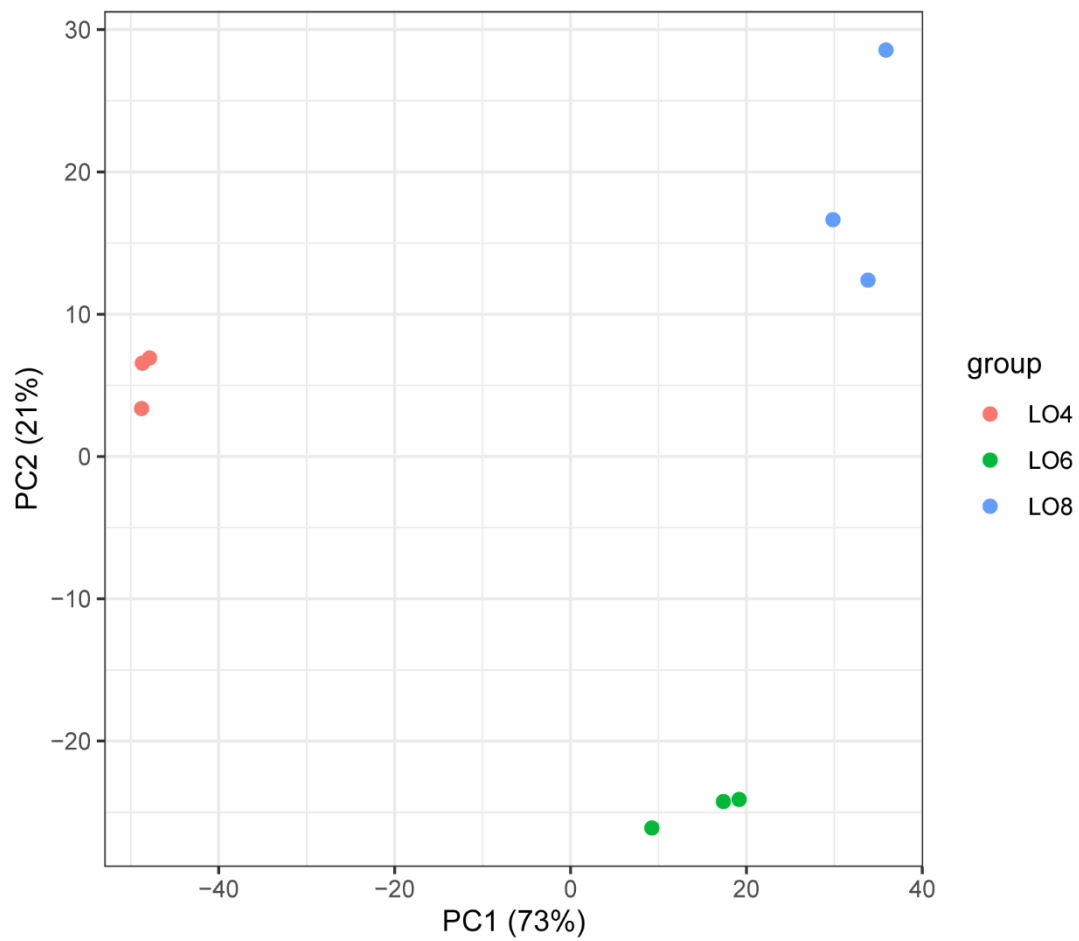

**Figure S1.** Biological replicates of three anther stages showed by the first two PCs which explained over 94% of variance among samples.

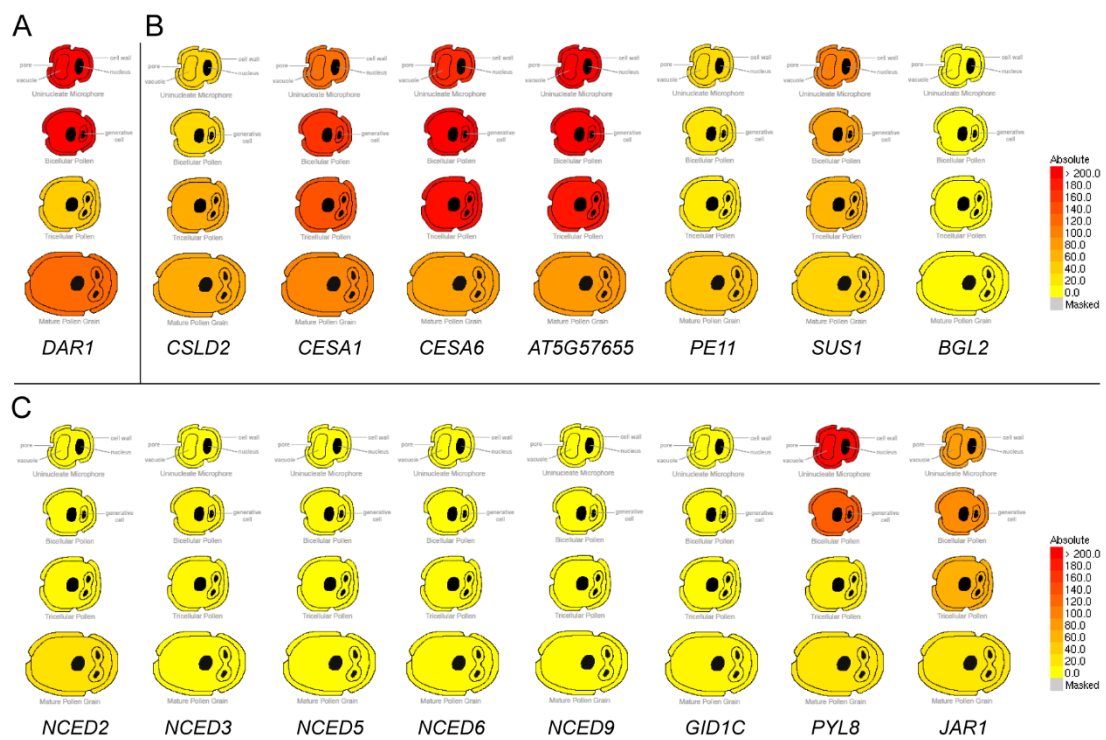

**Figure S2.** The 'eFP-seq' browser of genes related to the tapetum degradation and microspore development. The color scale from yellow to red represents expression levels from low to high.
